# Supplementary material for: Preliminary insight into the intracellular behaviour of rare earths and other technology-critical elements (TCEs) in northern pike liver: study of TCE-binding biomolecules via size-exclusion HPLC-ICP-MS
Source: Royal Society of Chemistry journal article supplement (doi:10.1039/d4em00674g), 2025-01-01

**Figure ESM.1.** The chromatograms obtained by separation of the cytosolic biomolecules form liver of the northern pike from the Mrežnica River (Croatia) using HPLC with size-exclusion (SEC<sub>200</sub>) column and UV/VIS detector: a) sample No. 52; b) sample No. 78; and c) sample No. 72. The results are presented as absorbances at two wavelengths (254 nm and 280 nm, presented in different colours; y-axis) versus elution time ( $t_e$ , min; x-axis).

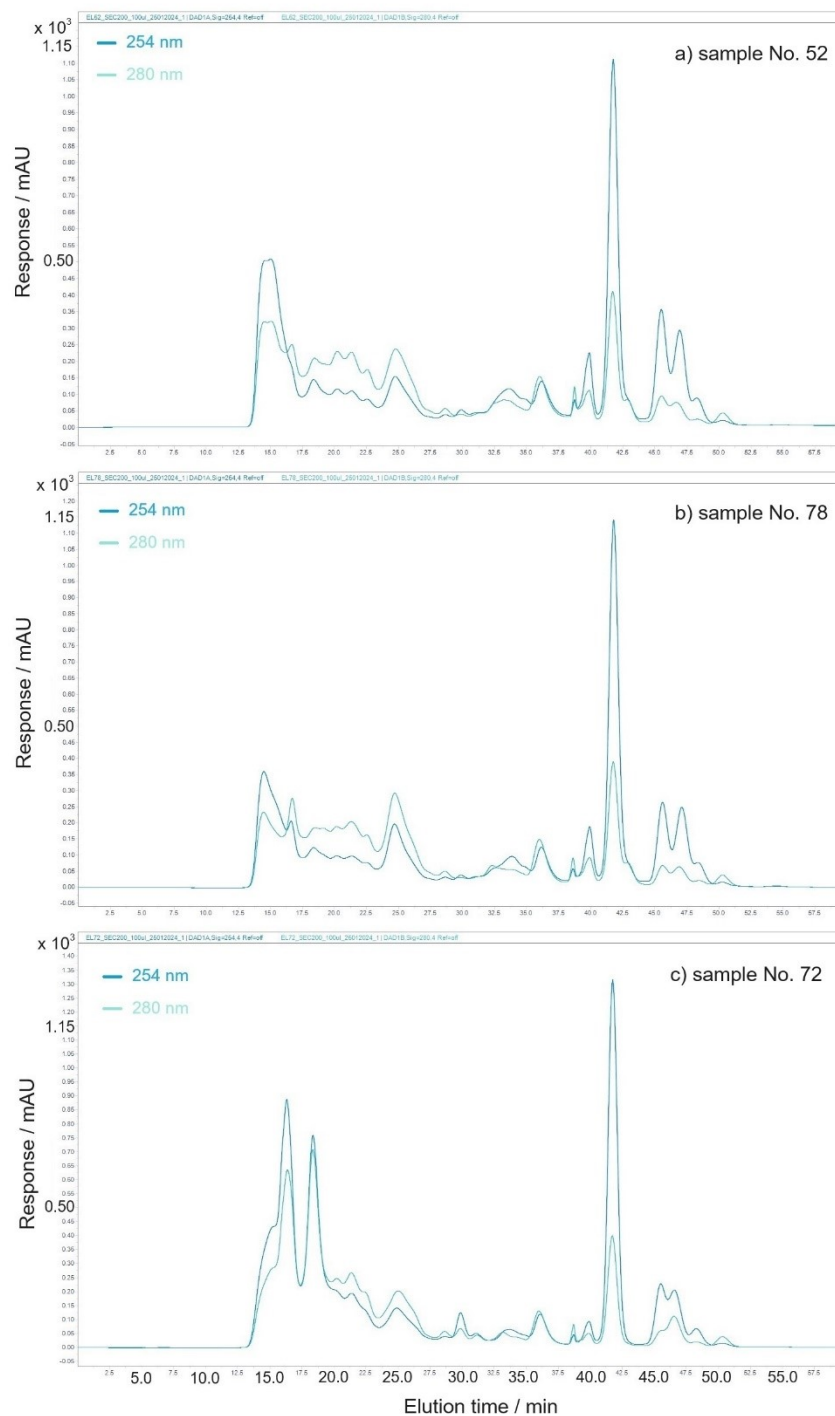

**Figure ESM.2.** The distribution profiles established for five lanthanides and W by chromatographic separation of the cytosolic biomolecules from liver of the northern pike from the Mrežnica River (Croatia) and elemental detection using online coupled HPLC-ICP-MS system with size-exclusion (SEC<sub>200</sub>) column: a) La; b) Ce; c) Pr; d) Nd; e) Gd; and f) W. The results are presented as element intensities (y-axis) versus elution time ( $t_e$ , min; x-axis) for each sample (n=6).

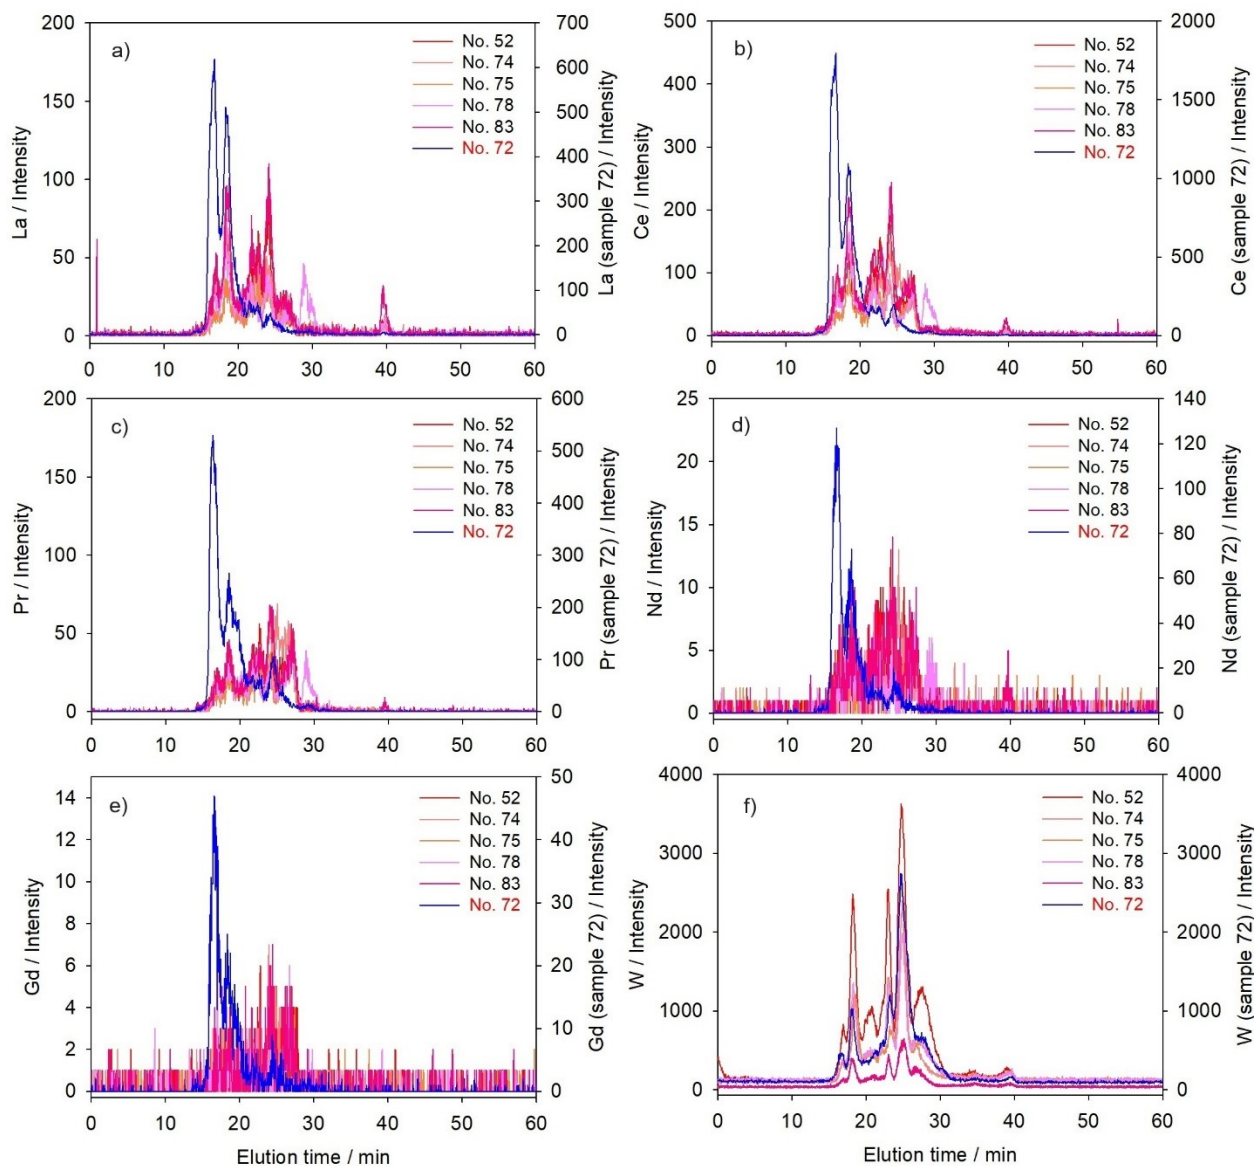

**Figure ESM.3.** The distribution profiles established for two actinides by chromatographic separation of the cytosolic biomolecules from liver of the northern pike from the Mrežnica River (Croatia) and elemental detection using online coupled HPLC-ICP-MS system with size-exclusion (SEC<sub>200</sub>) column: a) Th; and b) U. The results are presented as element intensities (y-axis) versus elution time ( $t_e$ , min; x-axis) for each sample (n=6).

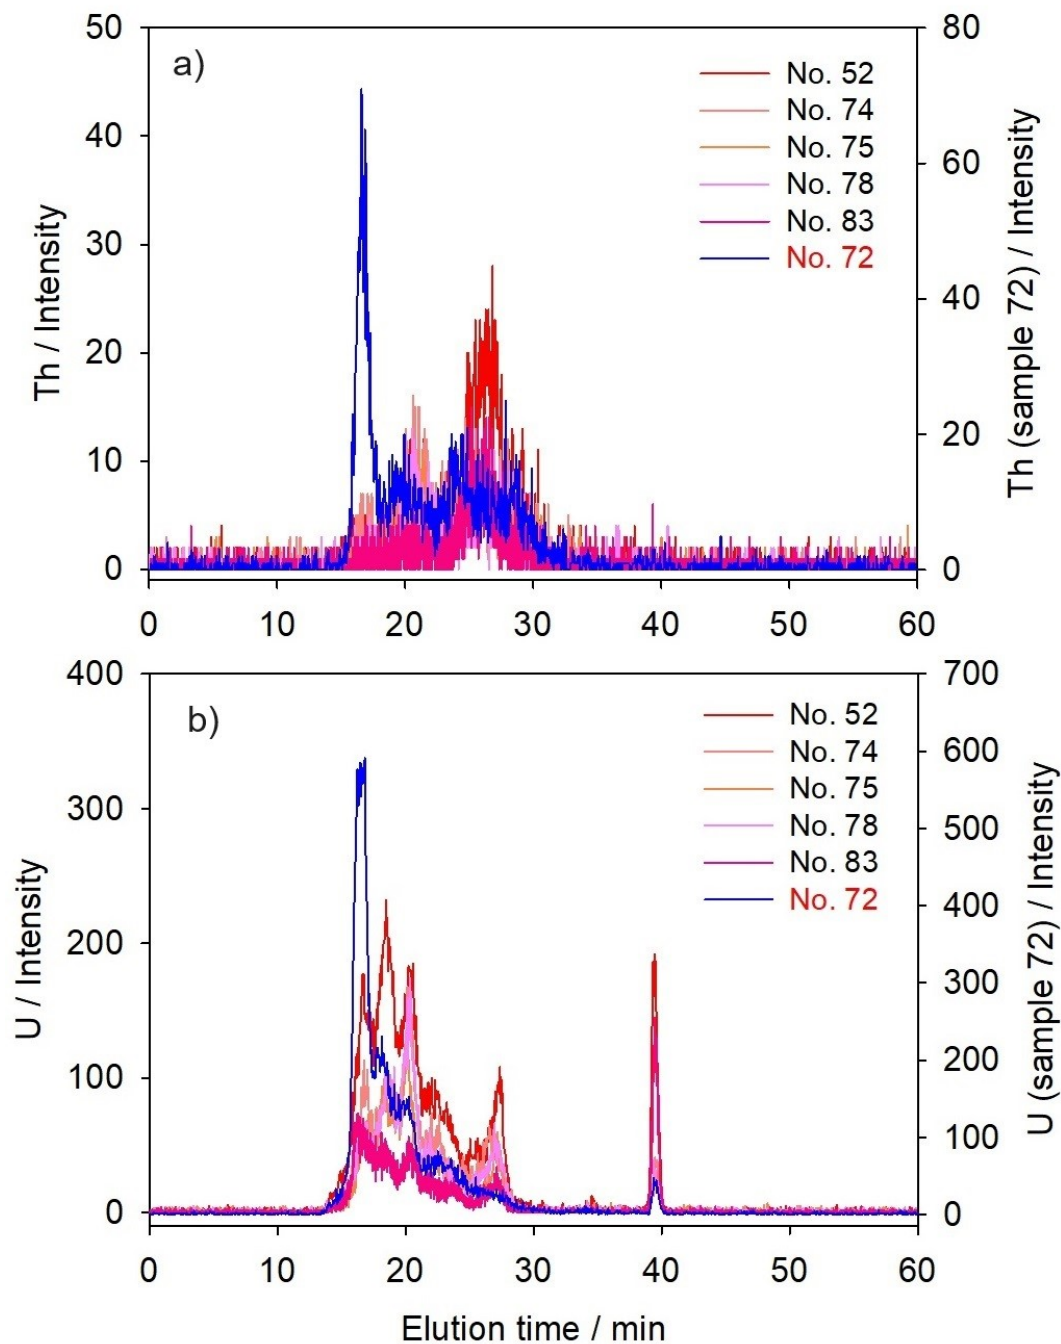

**Figure ESM.4.** The distribution profiles established for three transition/post-transition elements by chromatographic separation of the cytosolic biomolecules from liver of the northern pike from the Mrežnica River (Croatia) and elemental detection using online coupled HPLC-ICP-MS system with size-exclusion (SEC<sub>200</sub>) column: a) V; b) Tl; and c) Pb. The results are presented as element intensities (y-axis) versus elution time ( $t_e$ , min; x-axis) for each sample (n=5).

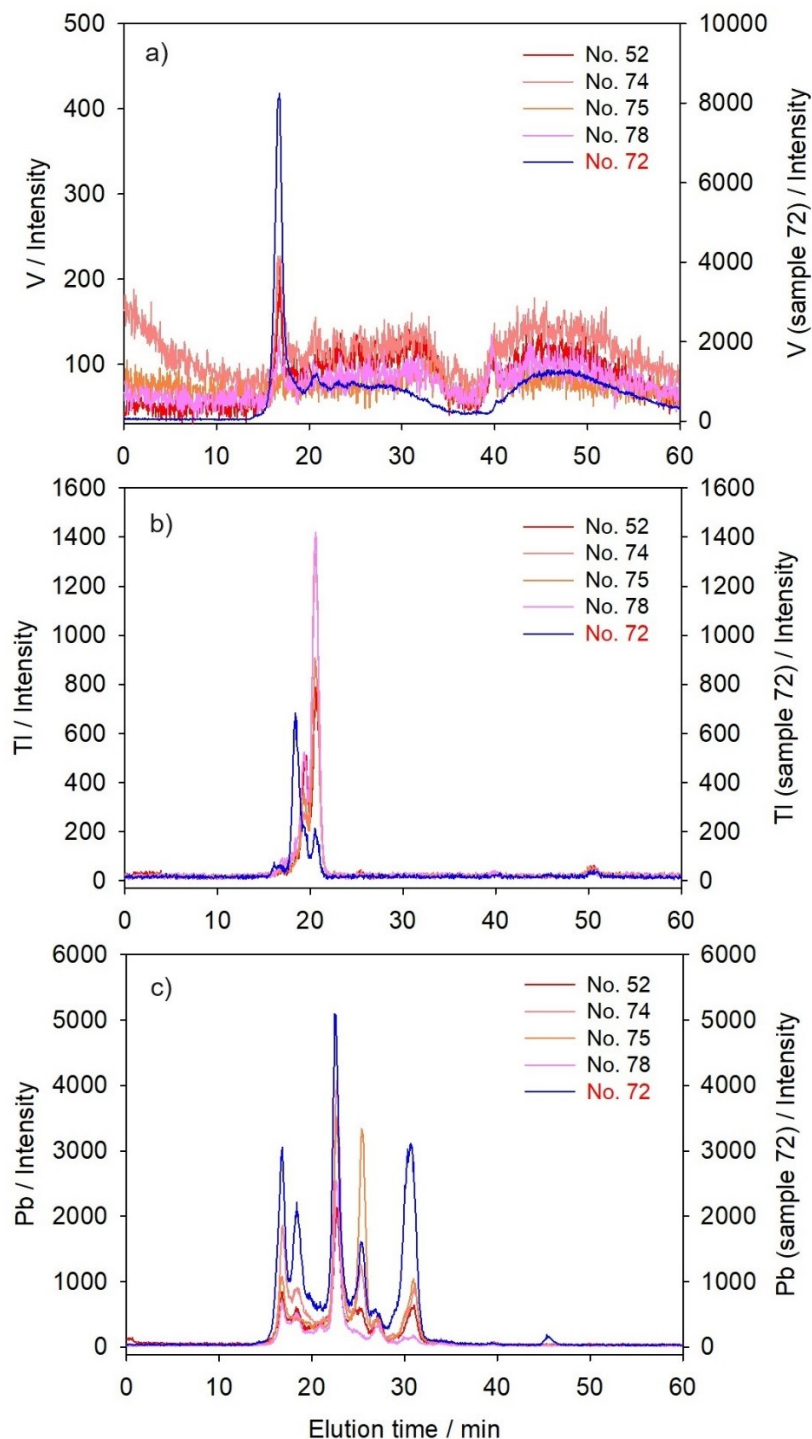

**Figure ESM.5.** The studied specimen of the northern pike (*Esox lucius*) No. 72 (female, age 4+, 69 cm long, and of total mass equal to 2.4 kg; Table 1) from the Mrežnica River (Croatia) – gut content included two undigested rats.

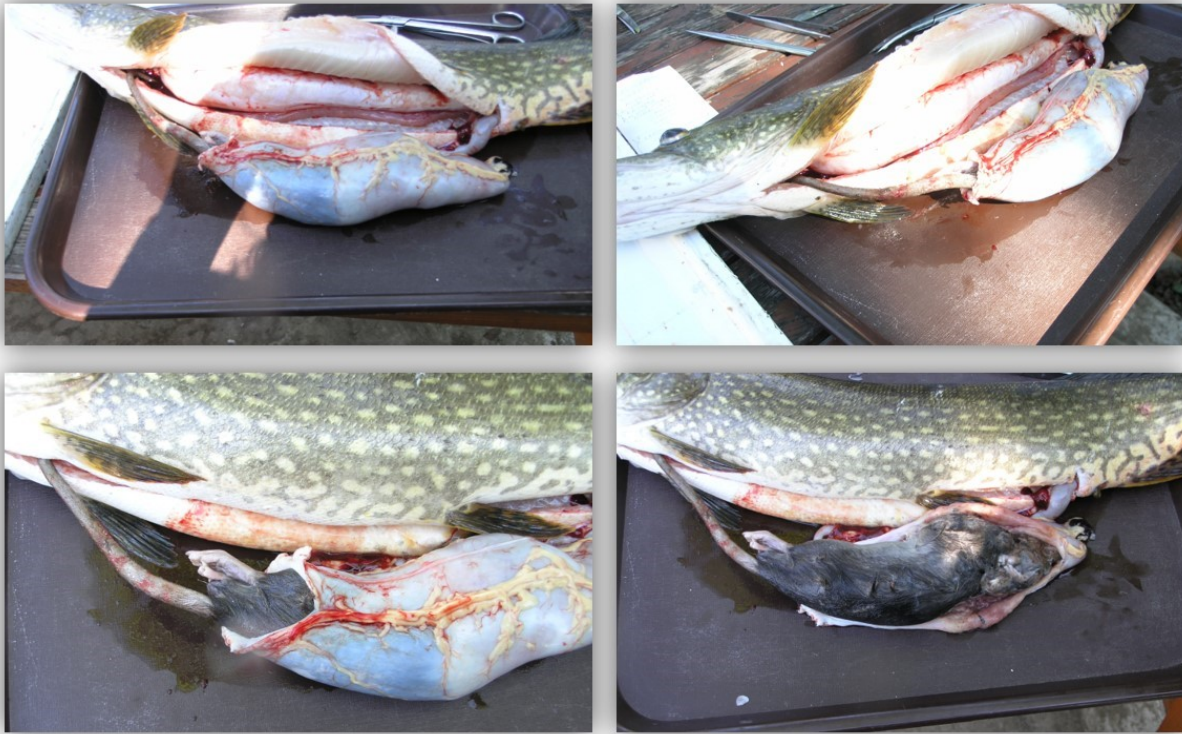

Supplement: d4em00674g1.pdf [file d4em00674g1.pdf]
